# Supplementary material for: Organic Anion Transporting Polypeptide 1B1 Is a Potential Reporter for Dual MR and Optical Imaging
Source: MDPI journal article supplement (doi:10.3390/ijms22168797), 2021-08-16
Supplement: s1 [file s1]

For DNA sequencing, both plasmids were sent to MISSION BIOTECH Company (Taipei, Taiwan). plasmid DNA including pLEX-1B1 and pFLAG-1B1 at the amount of 100 ng of for each sample was amplified and Sanger sequenced. The primer was used pLEX-MCS-F for forward sequencing, and pLEX-MCS-R for reverse sequencing. The information of sequencing primers were listed below.

#### Primer information

| Primer Name | Length | Tm    | %GC | Sequence 5'-3'           |
|-------------|--------|-------|-----|--------------------------|
| pLEX-MCS-F  | 20     | 59.83 | 45  | CACCAAAATCAACGGGACTT     |
| pLEX-MCS-R  | 24     | 60.3  | 50  | ATATAGACAAACGCACACCGGCCT |
