# Supplementary figures and images for: Organic Anion Transporting Polypeptide 1B1 Is a Potential Reporter for Dual MR and Optical Imaging
Source: MDPI journal article supplement (doi:10.3390/ijms22168797), 2021-08-16

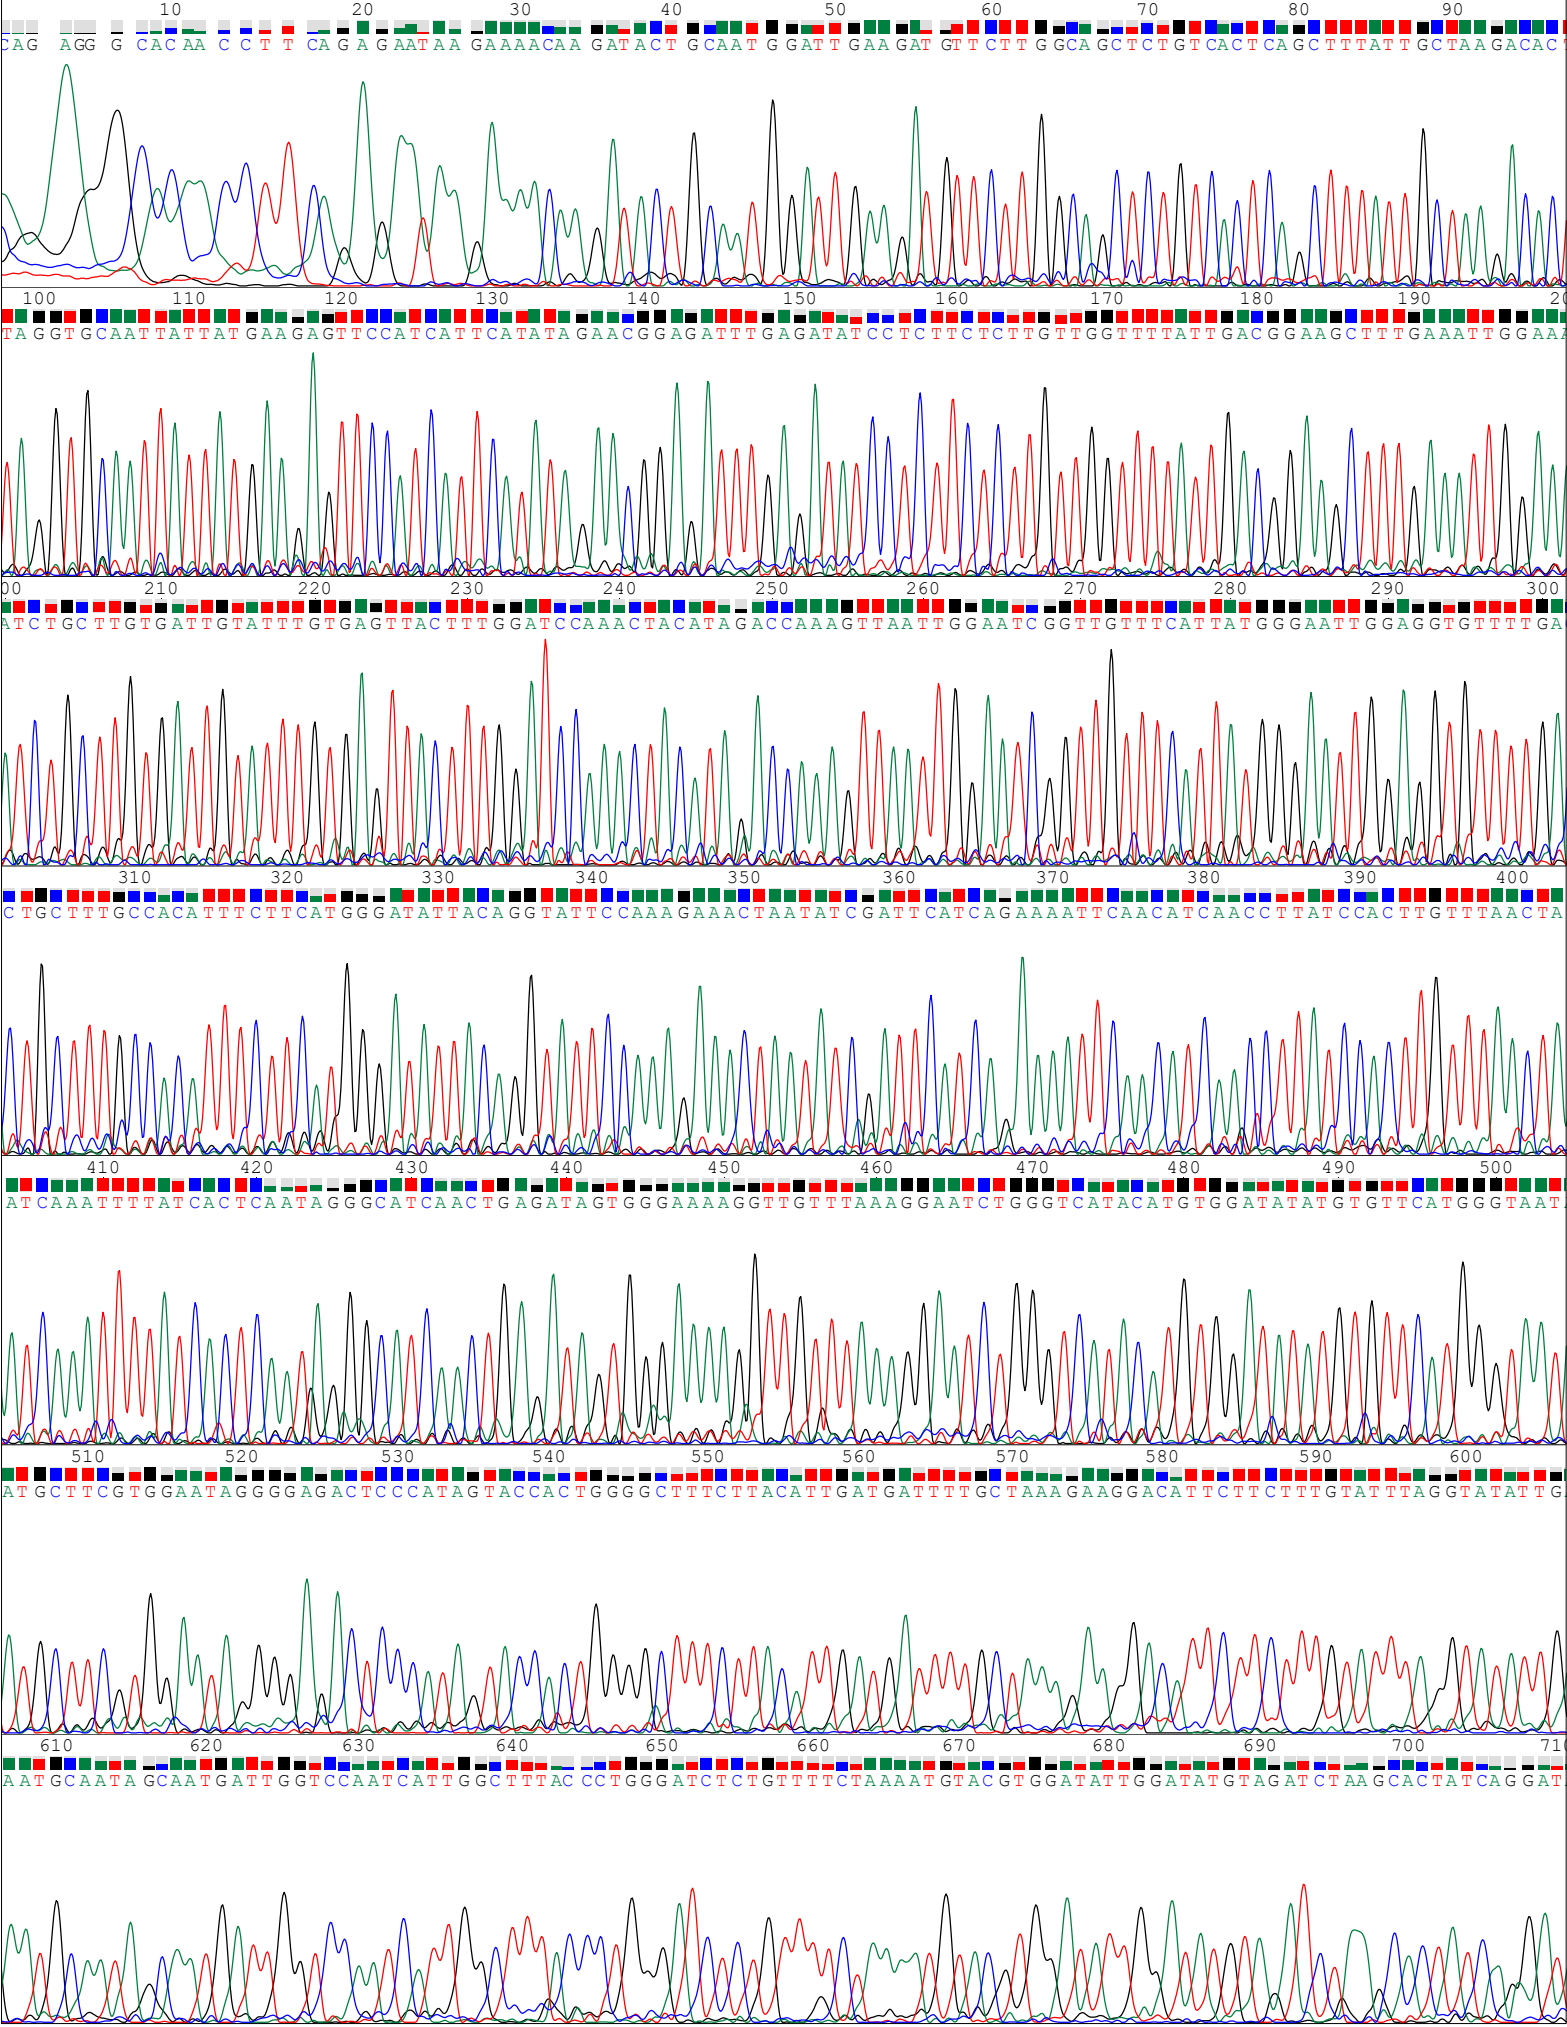

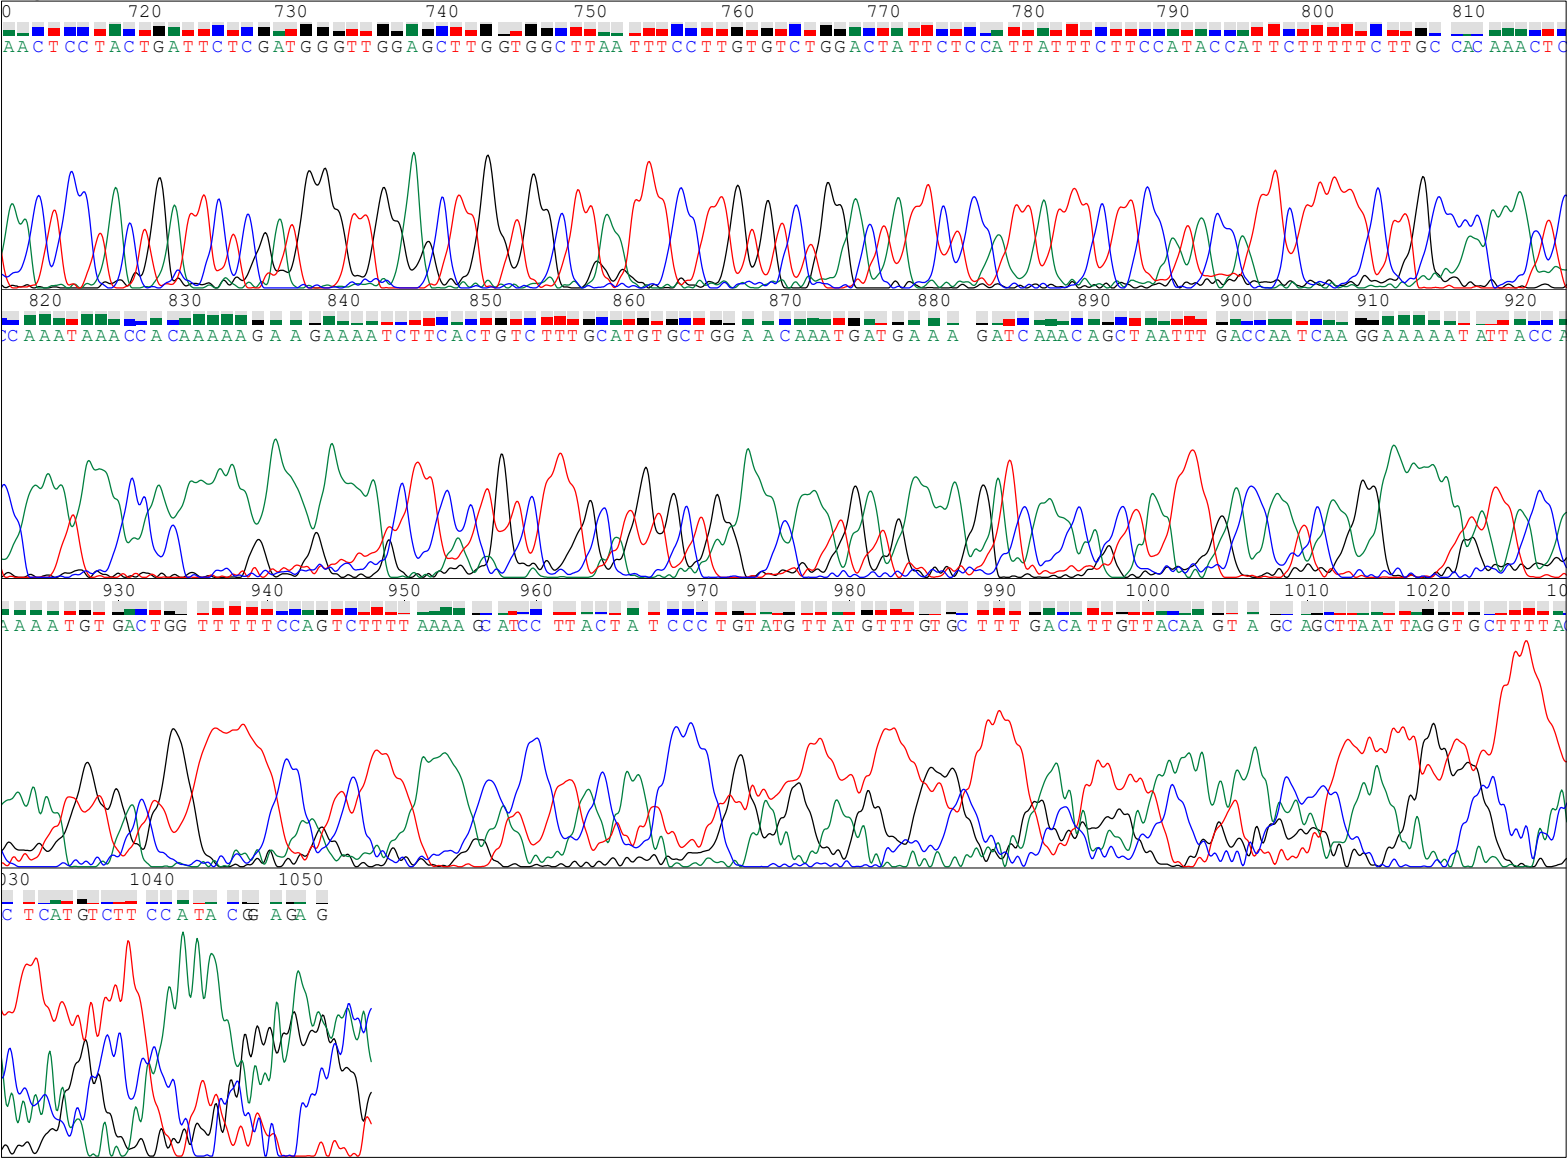

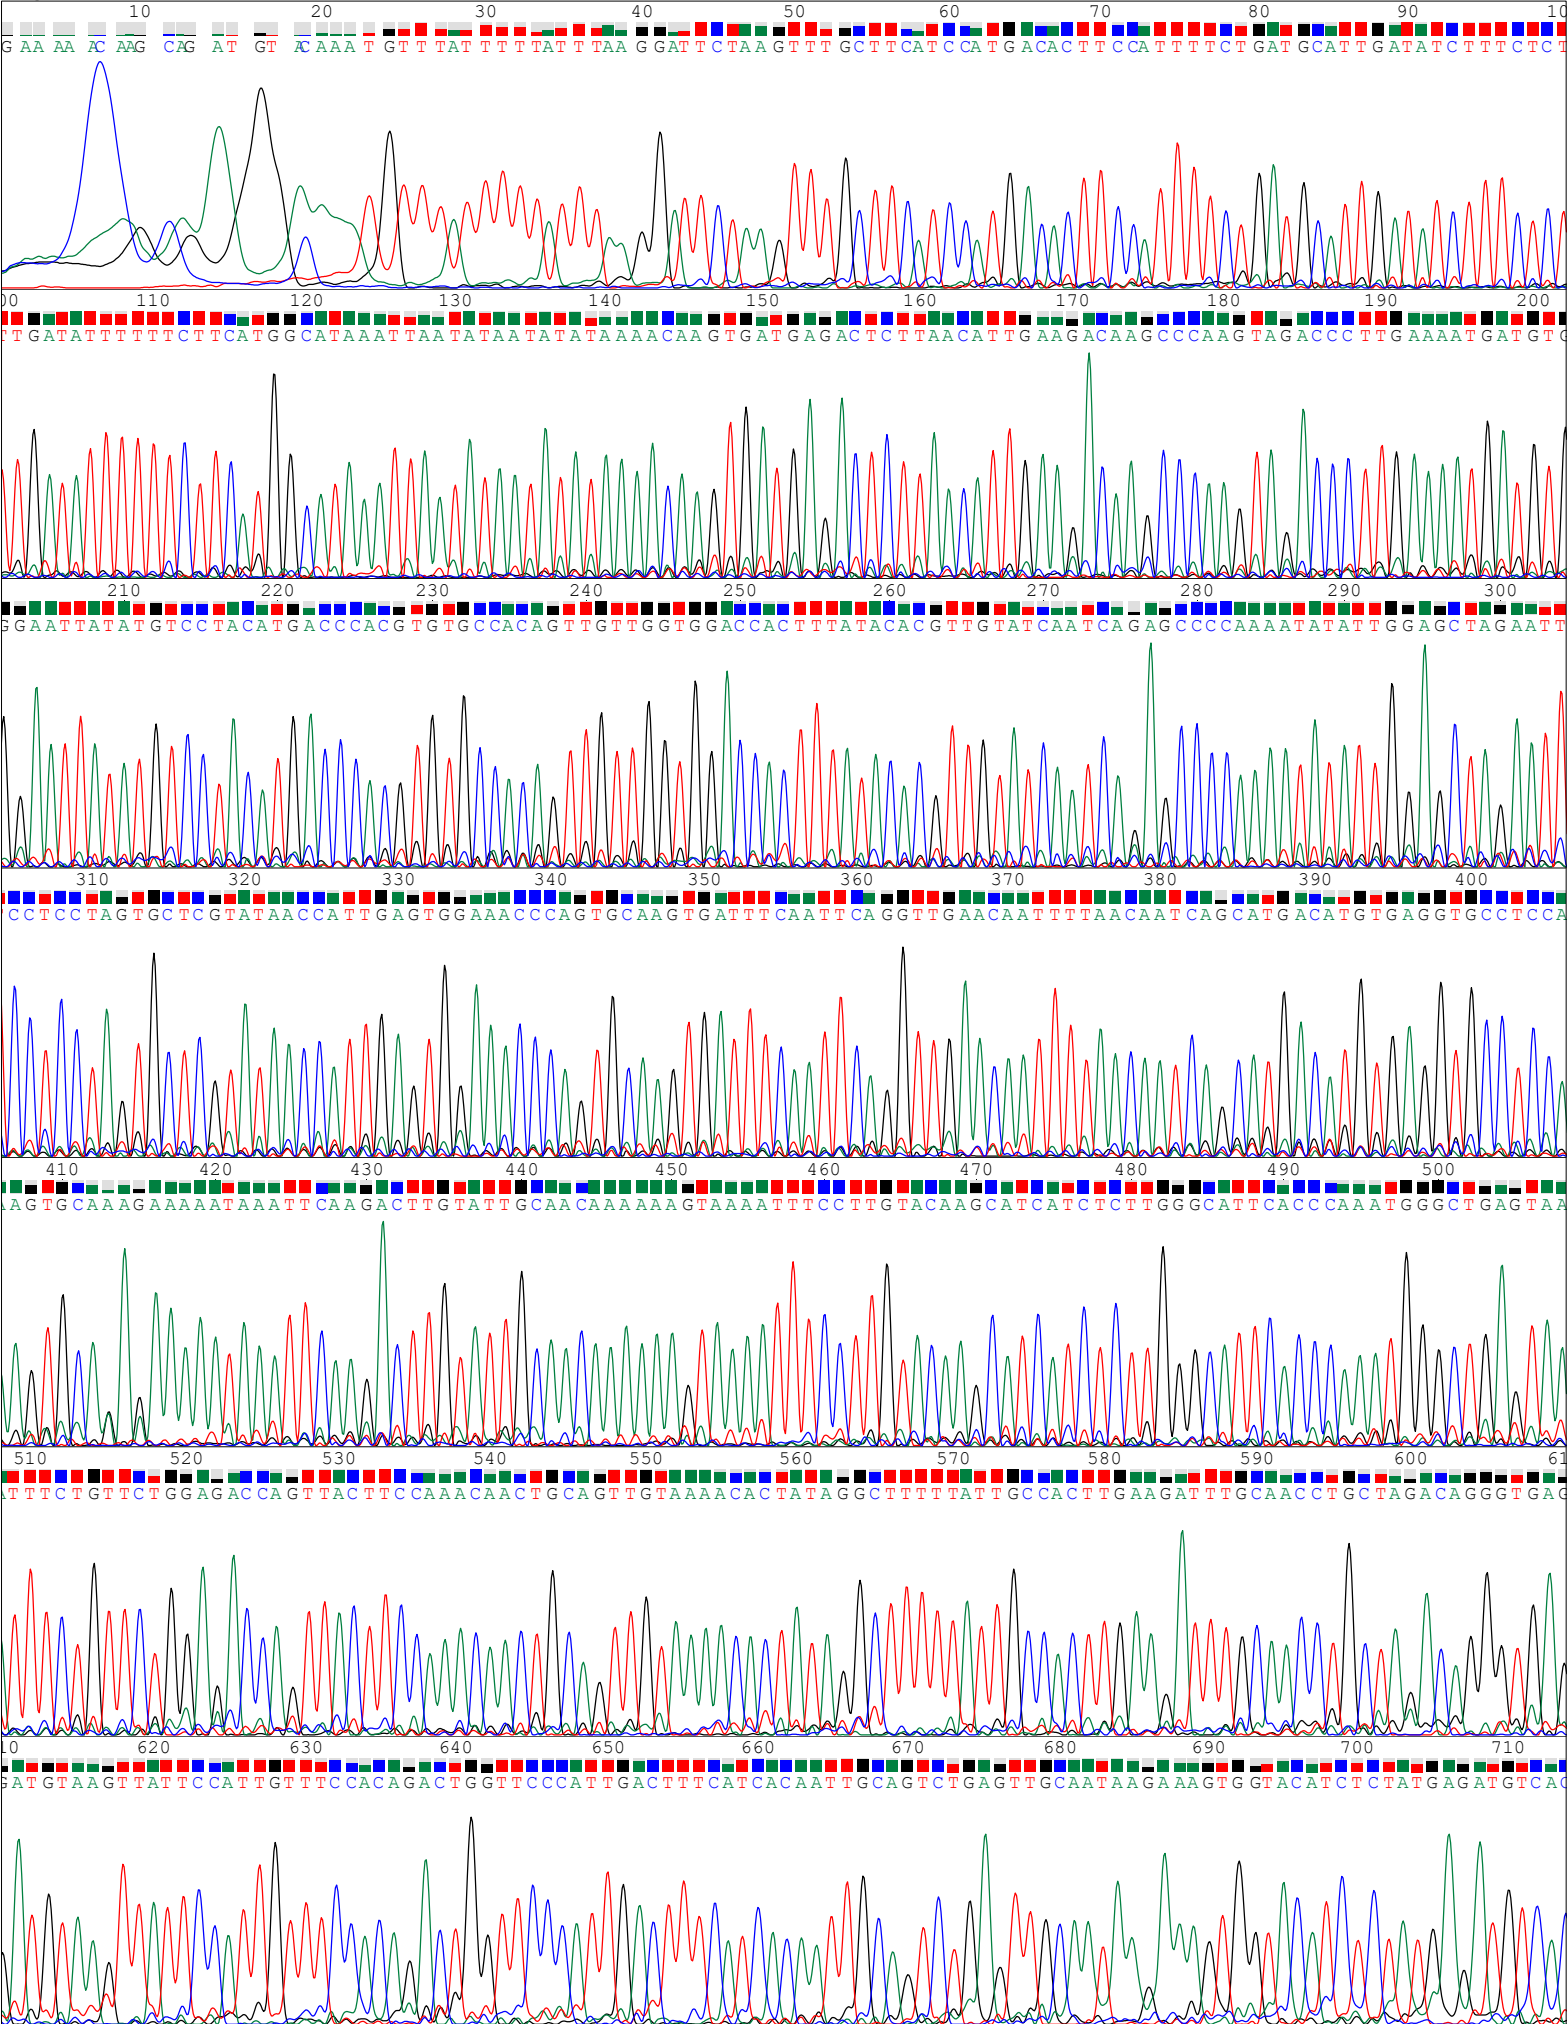

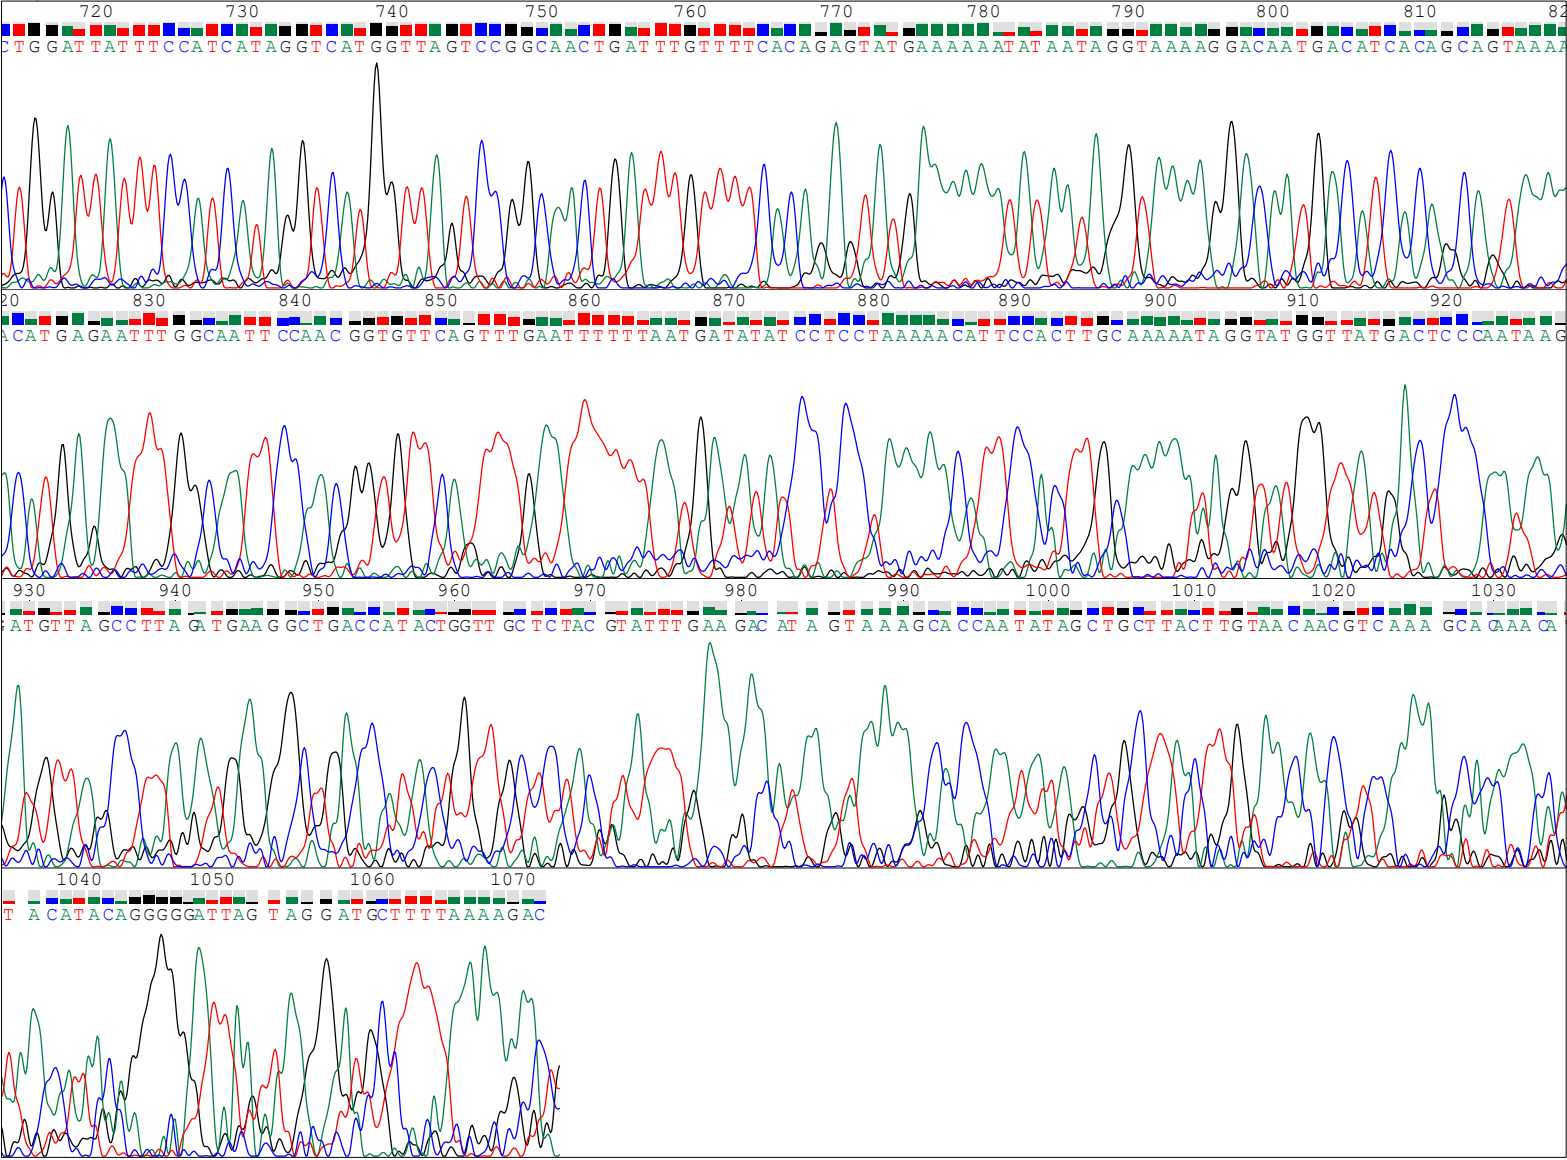

Supplement: s1 [file s1]
